# Supplementary material for: Nest site selection and nutritional provision through excreta: a form of parental care in a tropical endogeic earthworm
Source: PeerJ journal article supplement (doi:10.7717/peerj.2032), 2016-05-17
Supplement: Figure_1_PJ.pdf [file Figure_1_PJ.pdf]

1  
2  
3  
4  
5  
6  
7

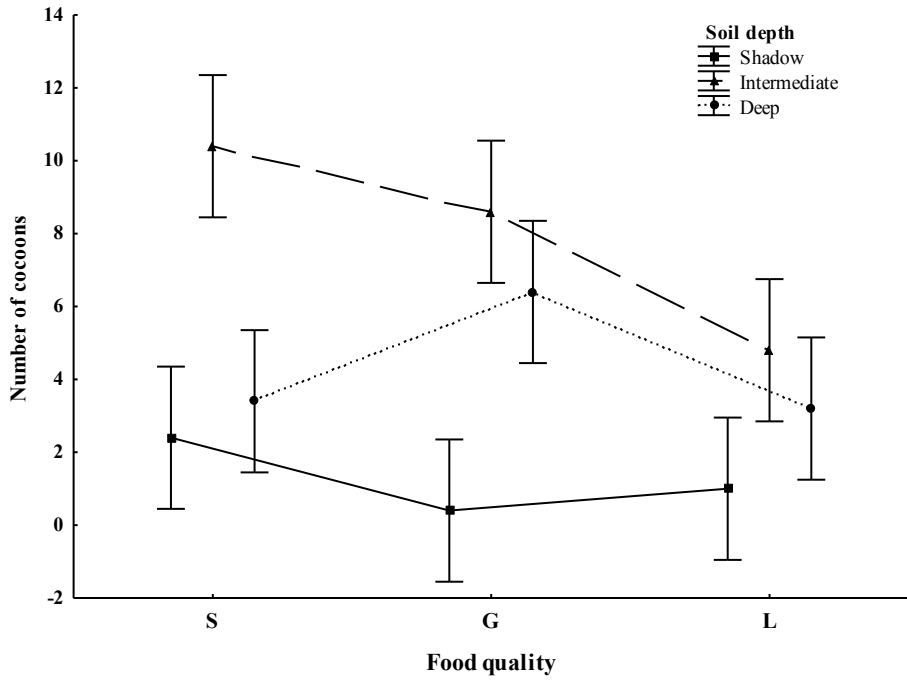

8
